# Supplementary material for: Interaction of Onset and Duration of Diabetes on the Percent of GAD and IA-2 Antibody–Positive Subjects in the Type 1 Diabetes Genetics Consortium Database
Source: Oxford University Press journal article supplement (doi:10.2337/dc10-1903), 2011-02-18

# SUPPLEMENTARY DATA

**Supplementary Table 1. Univariate Analysis of Race/Ethnicity on Antibody Status**

| Ethnicity                    | n    | GADA  |       |           | IA-2A |       |           | Aby+  |       |           |
|------------------------------|------|-------|-------|-----------|-------|-------|-----------|-------|-------|-----------|
|                              |      | % pos | OR    | CI        | % pos | OR    | CI        | % pos | OR    | CI        |
| non-Hispanic White/Caucasian | 4596 | 47.5  | 1     |           | 46.3  | 1     |           | 67.7  | 1     |           |
| Asian                        | 191  | 37.7  | 0.67‡ | 0.48-0.92 | 27.7  | 0.45* | 0.31-0.64 | 50.8  | 0.49* | 0.36-0.67 |
| Black/African American       | 80   | 46.3  | 0.95  | 0.57-1.57 | 46.3  | 1.00  | 0.61-1.64 | 61.3  | 0.75  | 0.45-1.27 |
| Pacific Islander             | 13   | 38.5  | 0.69  | 0.25-1.88 | 30.8  | 0.52  | 0.13-2.11 | 46.2  | 0.41  | 0.12-1.38 |
| Hispanic                     | 140  | 38.6  | 0.69  | 0.47-1.01 | 57.1  | 1.55  | 1.04-2.29 | 70.7  | 1.15  | 0.75-1.76 |

Shown are the results of three separate univariate analysis. Dependent variables are GADA, IA-2A or Aby+, and independent variables are self-reported race. Subjects could choose up the three races, though the first choice (primary race) was used to classify subjects in these analyses. Hispanic ethnicity was an additional question on study forms, and thus not mutually exclusive from other races (i.e. Caucasian). We choose to make Hispanics a separate category. Of 141 self-identified Hispanic individuals, 140 were Caucasian, and one was Black, the later of whom we classified as Black given the relatively smaller numbers of Black participants. Aby+ indicates those who are GADA and/or IA-2A positive. n – number of subjects, % pos – percent of antibody positive subjects, OR – odds ratio, CI – 95% confidence interval, X ≠ DR3 or DR4, \* p<0.0001, † p<0.001, ‡ p<0.05

# SUPPLEMENTARY DATA

**Supplementary Table 2. Multivariate Analysis of Onset and Duration, HLA type and Race/Ethnicity on Antibody Status**

| Covariates                   | n    | GADA  |       |           | IA-2A |       |           | Aby+  |       |           |
|------------------------------|------|-------|-------|-----------|-------|-------|-----------|-------|-------|-----------|
|                              |      | % pos | OR    | CI        | % pos | OR    | CI        | % pos | OR    | CI        |
| Duration 0-5 years           | 530  | 45.5  | 1     |           | 61.3  | 1     |           | 76.6  | 1     |           |
| Duration 6-13 years          | 644  | 34.8  | 0.62† | 0.48-0.79 | 44.6  | 0.46* | 0.36-0.58 | 62.3  | 0.46* | 0.36-0.61 |
| Duration ? 14 years          | 565  | 27.6  | 0.43* | 0.33-0.56 | 24.2  | 0.16* | 0.12-0.21 | 42.7  | 0.19* | 0.14-0.25 |
| Duration 0-5 years           | 745  | 58.8  | 1.75* | 1.39-2.22 | 65.1  | 1.19  | 0.93-1.53 | 82.1  | 1.43‡ | 1.07-1.91 |
| Duration 6-13 years          | 508  | 41.9  | 0.85  | 0.65-1.10 | 53.9  | 0.66‡ | 0.51-0.87 | 71.9  | 0.72‡ | 0.54-0.97 |
| Duration ? 14 years          | 514  | 37.0  | 0.65‡ | 0.50-0.85 | 35.0  | 0.29* | 0.22-0.38 | 56.2  | 0.34* | 0.26-0.46 |
| Duration 0-5 years           | 567  | 70.5  | 2.96* | 2.27-3.85 | 53.4  | 0.73‡ | 0.56-0.96 | 82.2  | 1.49‡ | 1.09-2.04 |
| Duration 6-13 years          | 389  | 65.3  | 2.22* | 1.67-2.95 | 42.7  | 0.42* | 0.31-0.56 | 73.8  | 0.81  | 0.59-1.11 |
| Duration ? 14 years          | 558  | 42.5  | 0.86  | 0.67-1.11 | 26.2  | 0.19* | 0.15-0.26 | 53.4  | 0.32* | 0.24-0.43 |
| X/X                          | 374  | 36.6  | 1     |           | 30.2  | 1     |           | 50.0  | 1     |           |
| DR3/X                        | 627  | 49.6  | 1.85† | 1.36-2.53 | 26.0  | 0.82  | 0.59-1.12 | 57.3  | 1.43‡ | 1.05-1.94 |
| DR3/DR3                      | 374  | 57.0  | 2.47* | 1.74-3.51 | 22.7  | 0.64‡ | 0.44-0.94 | 65.2  | 1.97† | 1.38-2.80 |
| DR3/DR4                      | 1847 | 47.9  | 1.88* | 1.42-2.49 | 49.1  | 2.55* | 1.94-3.36 | 70.2  | 2.85* | 2.16-3.76 |
| DR4/X                        | 1278 | 41.8  | 1.31  | 0.98-1.73 | 56.7  | 3.34* | 2.52-4.44 | 69.0  | 2.44* | 1.84-3.24 |
| DR4/DR4                      | 520  | 52.5  | 1.98* | 1.43-2.74 | 59.8  | 3.88* | 2.81-5.34 | 76.3  | 3.58* | 2.58-4.98 |
| non-Hispanic White/Caucasian | 4595 | 47.5  | 1     |           | 46.3  | 1     |           | 67.8  | 1     |           |
| Asian                        | 191  | 37.7  | 0.55† | 0.39-0.78 | 27.7  | 0.43† | 0.28-0.65 | 50.8  | 0.43* | 0.31-0.60 |
| Black                        | 80   | 46.3  | 0.93  | 0.56-1.55 | 46.3  | 0.92  | 0.52-1.60 | 61.3  | 0.70  | 0.40-1.21 |
| Pacific Islander             | 13   | 38.5  | 0.64  | 0.20-2.00 | 30.8  | 0.32  | 0.06-1.77 | 46.2  | 0.28  | 0.06-1.27 |
| Hispanic                     | 140  | 38.6  | 0.68  | 0.45-1.02 | 57.1  | 1.22  | 0.80-1.86 | 70.7  | 0.96  | 0.62-1.48 |

Shown are the results of three separate multivariate analysis. Dependent variables are GADA, IA-2A or Aby+, and independent variables (covariates) are age of onset (split into tertiles), duration of disease (split into tertiles), HLA type and race. Subjects could choose up the three races, though the first choice (primary race) was used to classify subjects in these analyses. Hispanic ethnicity was an additional question on study forms, and thus not mutually exclusive from other races (i.e. Caucasian). We choose to make Hispanics a separate category. Of 141 self-identified Hispanic individuals, 140 were Caucasian, and one was Black, the later of whom we classified as Black given the relatively smaller numbers of Black participants. Aby+ indicates those who are GADA and/or IA-2A positive. n – number of subjects, % pos – percent of antibody positive subjects, OR – odds ratio, CI – 95% confidence interval, X ≠ DR3 or DR4, \* p<0.0001, † p<0.001, ‡ p<0.05

# SUPPLEMENTARY DATA

**Supplementary Table 3. Multivariate Analysis of Onset and Duration on Antibody Status**

| Model | Covariates          | n   | GADA  |       |           | IA-2A |       |           | Aby+  |       |           |
|-------|---------------------|-----|-------|-------|-----------|-------|-------|-----------|-------|-------|-----------|
|       |                     |     | % pos | OR    | CI        | % pos | OR    | CI        | % pos | OR    | CI        |
| Onset | Duration 0-5 years  | 530 | 45.5  | 1     |           | 61.3  | 1     |           | 76.6  | 1     |           |
| 2-7   | Duration 6-13 years | 644 | 34.8  | 0.64† | 0.50-0.81 | 44.6  | 0.51* | 0.40-0.64 | 62.3  | 0.50* | 0.39-0.65 |
| Years | Duration ? 14 years | 565 | 27.6  | 0.46* | 0.35-0.59 | 24.2  | 0.20* | 0.16-0.26 | 42.7  | 0.23* | 0.17-0.30 |
| Onset | Duration 0-5 years  | 745 | 58.8  | 1.71* | 1.36-2.15 | 65.1  | 1.18  | 0.93-1.49 | 82.1  | 1.41‡ | 1.06-1.86 |
| 8-13  | Duration 6-13 years | 508 | 41.9  | 0.87  | 0.67-1.12 | 53.9  | 0.74‡ | 0.57-0.95 | 71.9  | 0.78  | 0.59-1.04 |
| Years | Duration ? 14 years | 514 | 37.0  | 0.70‡ | 0.54-0.91 | 35.0  | 0.34* | 0.26-0.44 | 56.2  | 0.39* | 0.30-0.52 |
| Onset | Duration 0-5 years  | 567 | 70.5  | 2.87* | 2.22-3.72 | 53.4  | 0.72‡ | 0.56-0.93 | 82.2  | 1.41‡ | 1.04-1.91 |
| ? 14  | Duration 6-13 years | 389 | 65.3  | 2.26* | 1.71-2.98 | 42.7  | 0.47* | 0.36-0.62 | 73.8  | 0.86  | 0.63-1.17 |
| Years | Duration ? 14 years | 558 | 42.5  | 0.89  | 0.69-1.14 | 26.2  | 0.22* | 0.17-0.29 | 53.4  | 0.35* | 0.27-0.46 |

Shown are the results of three separate univariate analysis. Dependent variables are GADA, IA-2A or Aby+, and independent variables (covariate) are age of onset (split into tertiles) and duration of disease (split into tertiles). Aby+ indicates those who are GADA and/or IA-2A positive). n – number of subjects, % pos – percent of antibody positive subjects, OR – odds ratio, CI – 95% confidence interval, X ≠ DR3 or DR4, \* p<0.0001, † p<0.001, ‡ p<0.05

SUPPLEMENTARY DATA

**Supplementary Figure 1. Percent GADA and IA-2A Positive Subjects with duration Diabetes 0-3 years.**

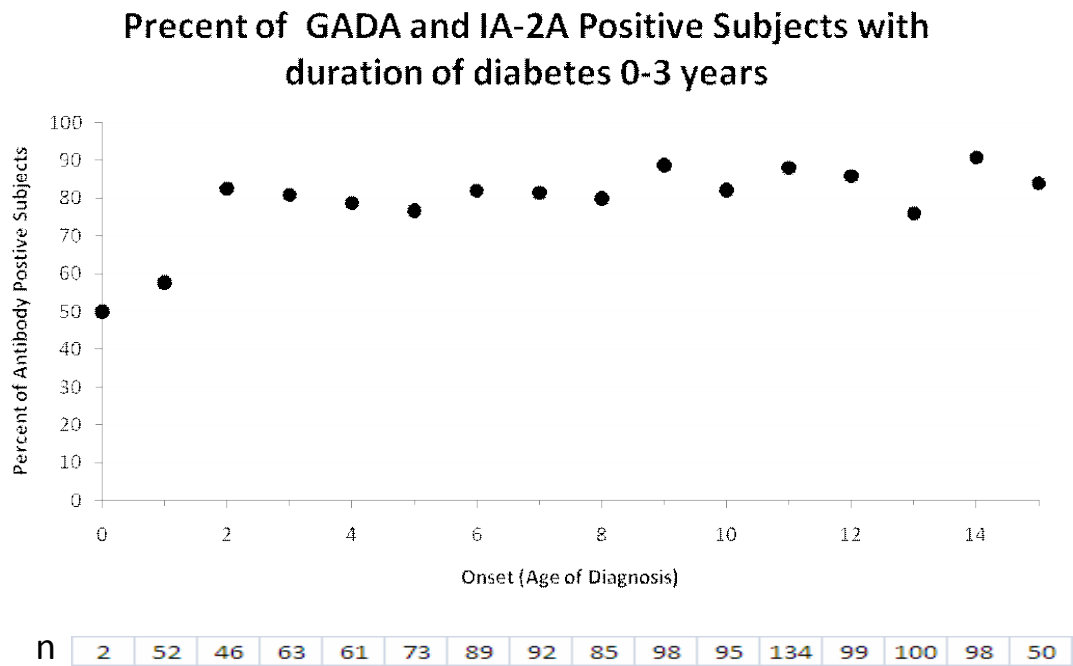

Onset: age of diagnosis. Numbers at bottom represent the number of subjects (n) per each year of onset.

**Supplementary Figure 2. A modified spline, similar to Figure 3A, was used to model the percentage of GADA positive subjects. We limited duration to 30 years in this model. The p-value represents the significance of the interaction of onset and duration.**

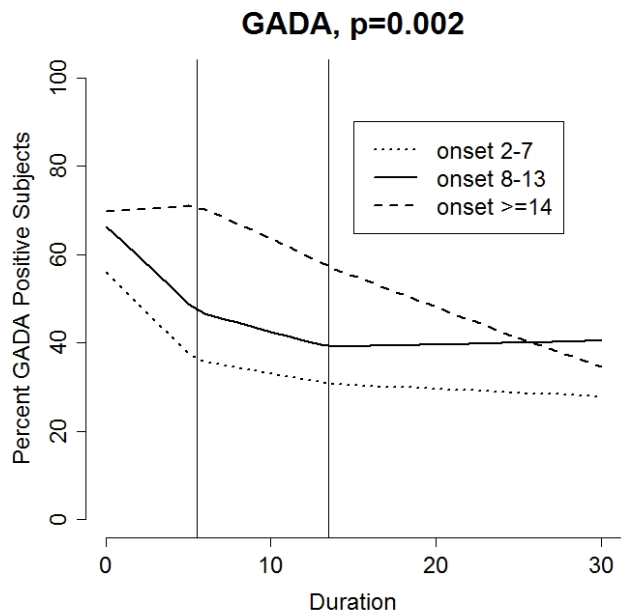

Supplement: dc101903supplementarydata.pdf [file dc101903supplementarydata.pdf]
